# Supplementary material
Source: Springer Nature journal article supplement (https://www.springermedizin.de/resource/supplementary/12874_2004_89_MOESM2_ESM.pdf/9433760)

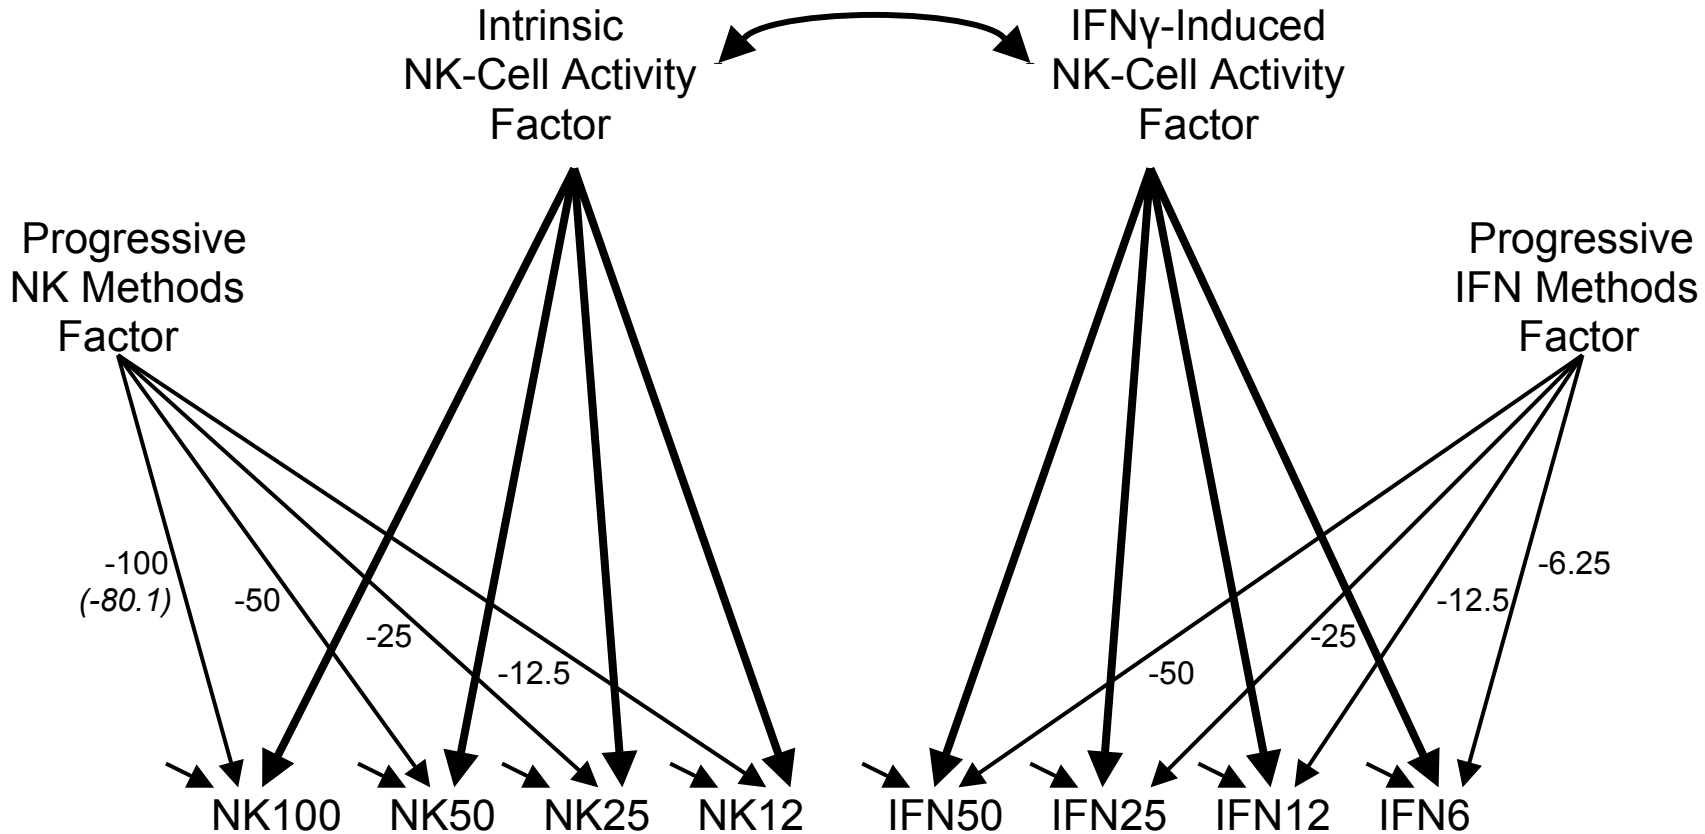

Supplement: MOESM2 [file 9433760]
